# Supplementary material for: An l -cysteine based sensor for Cu 2+ detection applicable for both environmental water and human plasma
Source: Royal Society of Chemistry journal article supplement (doi:10.1039/d4ay01680g), 2024-11-20
Supplement: d4ay01680g1.pdf [file d4ay01680g1.pdf]

## Supplementary Material

### **An L-cysteine based sensor for Cu<sup>2+</sup> detection applicable for both environmental water and human plasma**

Yanhong Chen<sup>a</sup>, Li Lv<sup>a,\*</sup>, Xuanjiao Mao<sup>b</sup>, Jun Chai<sup>a</sup>, Jayne Wu<sup>c</sup>, Yicheng Zhou<sup>a</sup>, Jian Zhang<sup>a</sup>, Haochen Qi<sup>a,\*</sup>

<sup>a</sup> College of Electrical and Electronic Engineering, Wenzhou University, Wenzhou 325035, China

<sup>b</sup> Clinical Laboratory, The People's Hospital of Pingyang, Wenzhou 325400, China

<sup>c</sup> Department of Electrical Engineering and Computer Science, The University of Tennessee, Knoxville, TN 37996, USA

<sup>d</sup> State Key Laboratory of Transducer Technology, Shanghai Institute of Microsystem and Information Technology, Chinese Academy of Sciences, Shanghai 200050, China

### **Table of Contents**

Fig. S1 CV curves of SPCE cleaning step (pretreatment for SPCEs).

Fig. S2 Electrodeposition process of AuNPs.

Fig. S3 Functional characterization of sensors.

Fig. S4 Optimization of background PH value and enrichment time.

Fig. S5 Reproducibility and stability of the sensor.

Fig. S6 DPV curve and fitting curve for determination of Cu<sup>2+</sup> in plasma

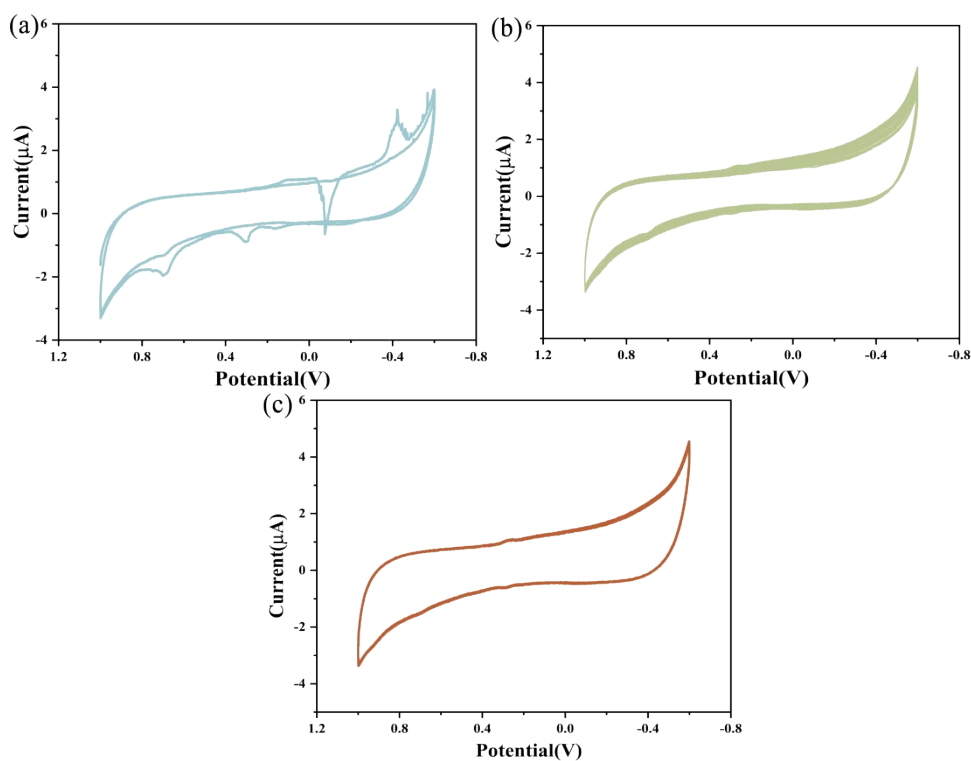

**Fig. S1 CV curves of cleaning step (a) CV curves for the first four stages of the cleaning step, (b) CV curves for the last 28 stages of the cleaning step, (c) CV curves for the last 4 stages of the cleaning step**

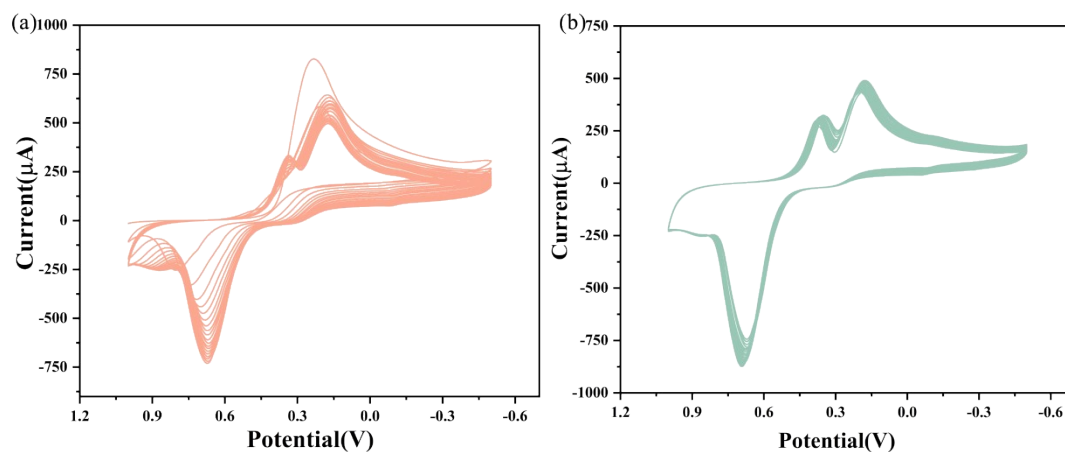

**Fig. S2 CV electrodeposition of AuNPs (a) CV scanning results of the first 36 stages of AuNPs electrodeposition, (b) CV scanning results of AuNP electrodeposition at the last 36 stages**

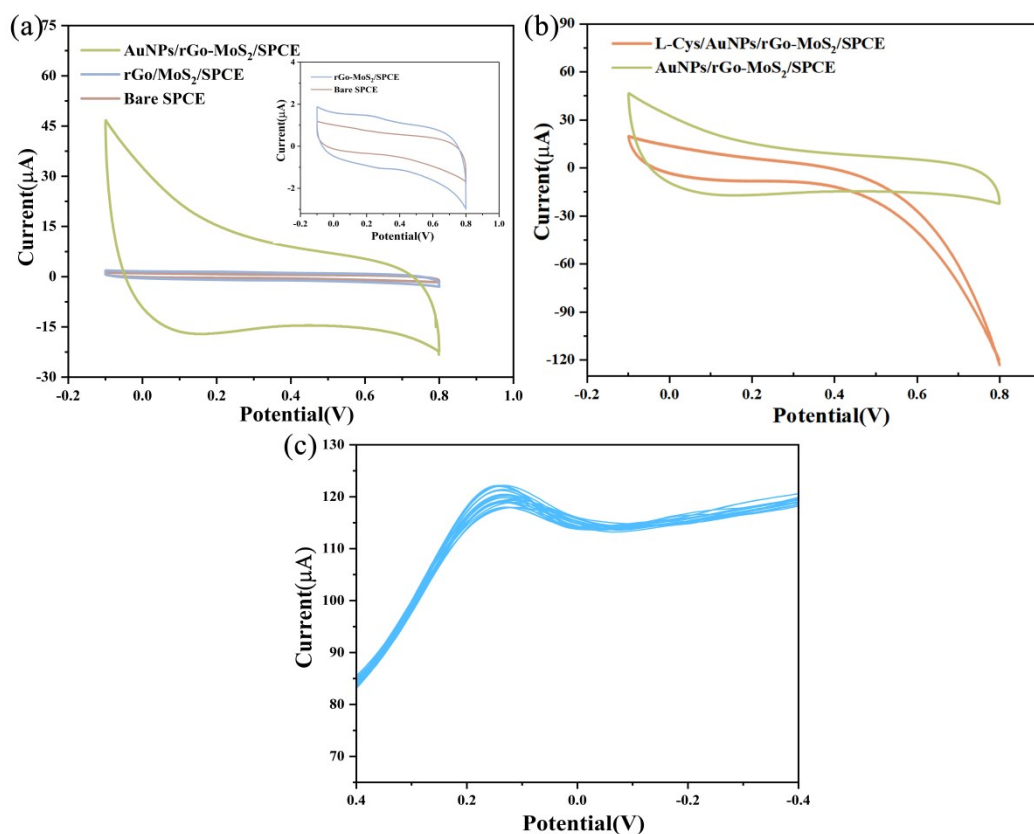

**Fig. S3 (a)CV curves from a bare SPCE, rGo-MoS<sub>2</sub>/SPCE and AuNPs/rGo-MoS<sub>2</sub>/SPCE, (b) AuNPs/rGo-MoS<sub>2</sub> / SPCE and L-Cys/AuNPs/rGo-MoS<sub>2</sub> / SPCE, (c)DPV curves for 30 measurements of 60  $\mu$ L of 50  $\mu$ M Cu<sup>2+</sup> by L-Cys/AuNPs/rGo-MoS<sub>2</sub>/SPCE**

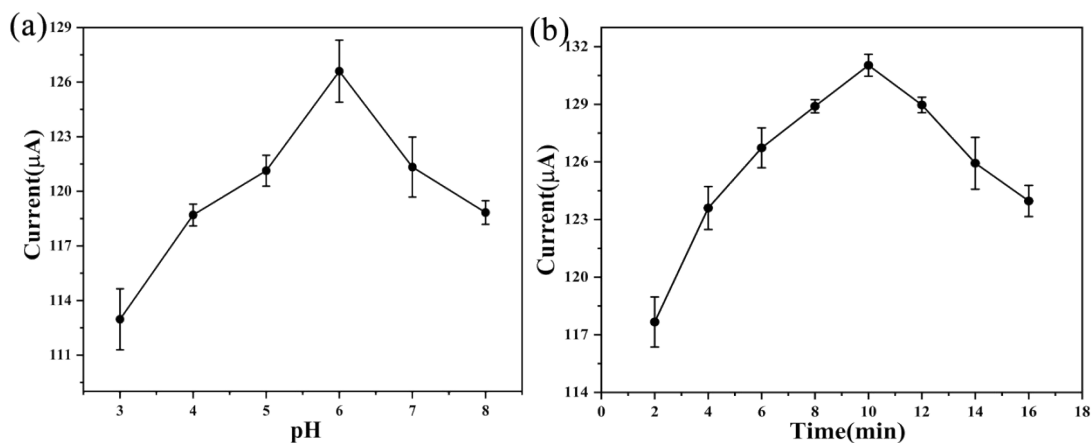

**Fig. S4 (a) Optimization of PH of the background (0.1  $\times$  PBS), (b) Optimization of Cu<sup>2+</sup> enrichment time**



---

|    |       |     |
|----|-------|-----|
| 7  | 0.150 | 121 |
| 8  | 0.150 | 121 |
| 9  | 0.150 | 120 |
| 10 | 0.150 | 120 |
| 11 | 0.150 | 122 |
| 12 | 0.145 | 122 |
| 13 | 0.150 | 121 |
| 14 | 0.140 | 121 |
| 15 | 0.145 | 121 |
| 16 | 0.150 | 119 |
| 17 | 0.150 | 120 |
| 18 | 0.150 | 120 |
| 19 | 0.150 | 120 |
| 20 | 0.130 | 119 |
| 21 | 0.140 | 119 |
| 22 | 0.140 | 119 |
| 23 | 0.140 | 118 |
| 24 | 0.135 | 118 |
| 25 | 0.125 | 119 |
| 26 | 0.135 | 119 |
| 27 | 0.135 | 119 |
| 28 | 0.130 | 118 |
| 29 | 0.130 | 118 |
| 30 | 0.130 | 119 |

---
